# Supplementary material
Source: publisher figshare collection journal article supplement (https://karger.figshare.com/ndownloader/files/17708426)
Supplement: Supplementary file 1 [file 17708426]

**Table S3. Change in fetal fraction per day**


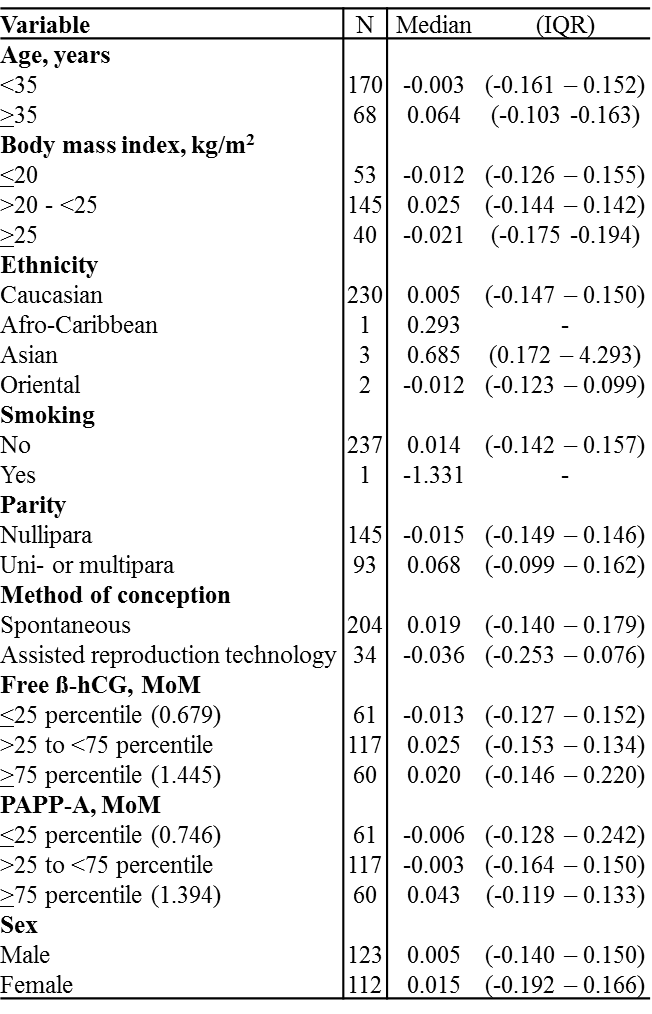


The table includes pregnancies with two samples with a fetal fraction at or above 4% (n=238)**.**
